# Supplementary material
Source: HighWire-hosted journal article supplement (https://www.highwirestage.com/highwire/filestream/52234/field_highwire_adjunct_files/0/2409_materials.pdf)
Supplement: 2409_materials.pdf [file 2409_materials.pdf]

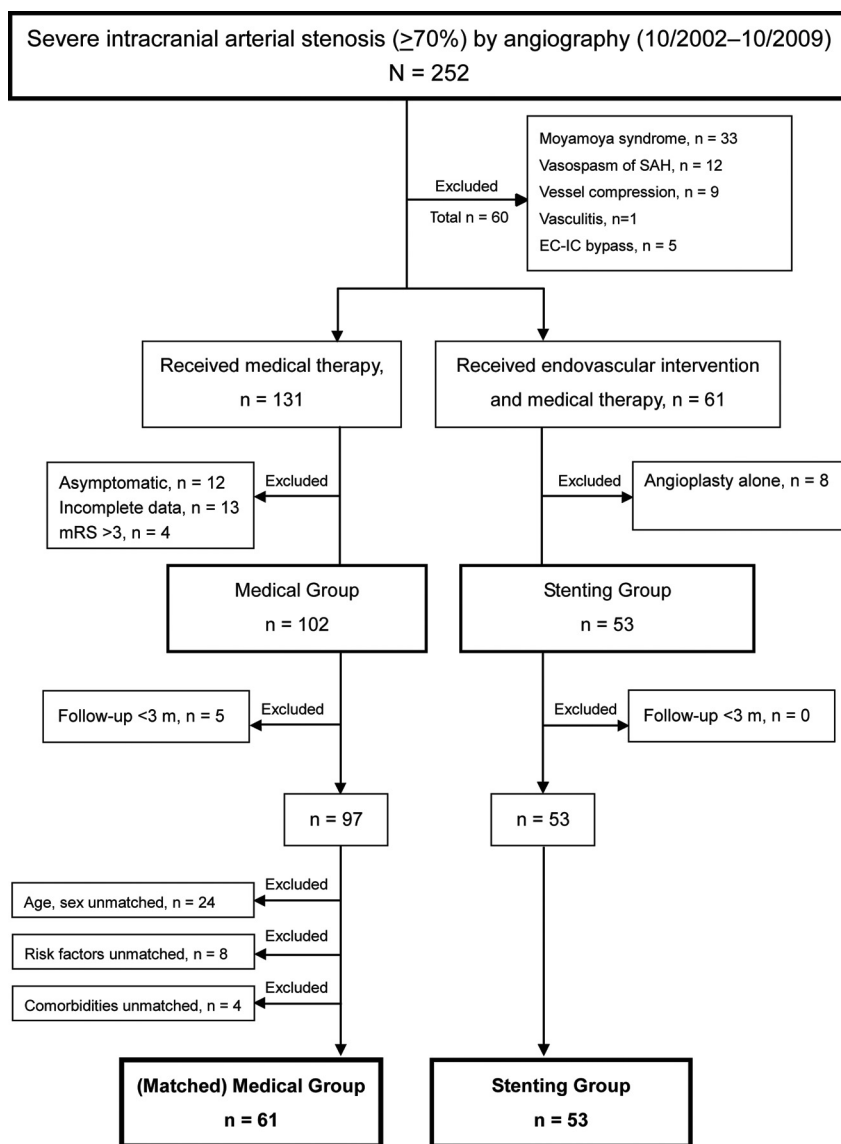

**On-line Fig 1.** The enrollment flow chart of the stent-placement and medical groups.

**On-line Table: Clinical outcomes<sup>a</sup>**

|                                           | Medical Group ( <i>n</i> = 61) |                         | Stenting Group ( <i>n</i> = 53) |                         |
|-------------------------------------------|--------------------------------|-------------------------|---------------------------------|-------------------------|
|                                           | Event (No.) (%)                | (1-Year Probability, %) | Event (No.) (%)                 | (1-Year Probability, %) |
| Clinical events                           |                                |                         |                                 |                         |
| Total events <sup>b</sup>                 | 15 (24.6)                      | (23)                    | 12 (22.6)                       | (22)                    |
| Major events <sup>c</sup>                 | 6 (9.8)                        | (8)                     | 2 (3.2)                         | (2)                     |
| Functional outcome                        |                                |                         |                                 |                         |
| Favorable functional outcome <sup>d</sup> | 48 (78.7)                      | (12)                    | 50 (94.3)                       | (5)                     |
| Clinical event subtypes                   |                                |                         |                                 |                         |
| All ischemic strokes                      | 11 (16.7)                      | (17)                    | 7 (13.2)                        | (14)                    |
| Ipsilateral ischemic strokes              | 7 (11.7)                       | (12)                    | 6 (11.3)                        | (14)                    |
| Immediate events ( $\leq 7$ days)         | 1 (1.6)                        | —                       | 9 (17.0)                        | —                       |
| Ischemic stroke/ipsilateral               | 0/0                            | —                       | 6/6                             | —                       |
| TIA/ipsilateral                           | 1/1                            | —                       | 0/0                             | —                       |
| Hemorrhagic stroke                        | 0                              | —                       | 3                               | —                       |
| Non-CVA vascular death                    | 0                              | —                       | 0                               | —                       |
| Long-term events ( $> 7$ days)            | 14 (23.3)                      | —                       | 3 (6.8)                         | —                       |
| Ischemic stroke/ipsilateral               | 11/7                           | —                       | 1/0                             | —                       |
| TIA/ipsilateral                           | 1/1                            | —                       | 1/1                             | —                       |
| Hemorrhagic stroke                        | 1                              | —                       | 0                               | —                       |
| Non-CVA vascular death                    | 1                              | —                       | 1                               | —                       |
| In-stent restenosis                       |                                |                         |                                 |                         |
| Stent number                              | —                              | —                       | 2                               | (4)                     |
| Vascular risk factors <sup>d</sup>        |                                |                         |                                 |                         |
| Systolic BP (mm Hg)                       | 142.5 $\pm$ 24.4               | —                       | 129.3 $\pm$ 14.7                | —                       |
| HbA1c (%)                                 | 7.8 $\pm$ 1.3                  | —                       | 7.6 $\pm$ 1.5                   | —                       |
| Total cholesterol (mg/dL)                 | 203 $\pm$ 41.8                 | —                       | 184 $\pm$ 51.2                  | —                       |

<sup>a</sup> Total events include stroke (infarction or hemorrhage), TIA, and vascular death other than stroke.

<sup>b</sup> Major events include disabling stroke (mRS score,  $> 3$ ) and all vascular deaths.

<sup>c</sup> Disabling functional outcome includes all conditions with an mRS score of  $> 3$ .

<sup>d</sup> From the available data expressed as mean  $\pm$  SD.
